# Supplementary material
Source: Research Square preprint supplement (doi:10.21203/rs.3.rs-10021244/v1)
Supplement: Supplementary file 1 [file 5dbc80bc19341a1bef2ec84d.docx]

**Supplementary Table 1.** Breakdown of autism diagnostic groups and their corresponding Field IDs in the UK Biobank.

| **Field ID** | **Field Description** | **Diagnostic Label** |
| --- | --- | --- |
| 41270 | Diagnoses – ICD10 | F84.0 - Childhood Autism |
|  |  | F84.1 - Atypical Autism |
|  |  | F84.2 - Rett Syndrome |
|  |  | F84.5 - Asperger Syndrome |
| 41202 | Diagnoses – main ICD10 | F84.0 - Childhood Autism |
|  |  | F84.1 - Atypical Autism |
|  |  | F84.2 - Rett Syndrome |
|  |  | F84.5 - Asperger Syndrome |
| 29000 | Mental health conditions ever diagnosed by a professional | Autism, Asperger's or autistic spectrum disorder |
| 32324 | Diagnosis of autism by a medical professional | Yes |
|  |  |  |

**Supplementary Table 2.** UK Biobank variables used in the current study.

| **Field ID** | **Description** | **Value Type** |
| --- | --- | --- |
| 31 | Sex | Categorical |
| 33 | Year of birth | Continuous |
| 54 | UK Biobank Assessment Centre | Categorical |
| 191 | Date withdrawn | Date |
| 6138 | Qualifications | Categorical |
| 6142 | Employment status | Categorical |
| 20277 | Job code at visit | Categorical |
| 21000 | Ethnicity | Categorical |
| 22001 | Genetic sex | Categorical |
| 22189 | Townsend Deprivation Index | Continuous |
| 29000 | Mental health conditions ever diagnosed by a professional | Categorical |
| 32324 | Diagnosis of autism by a medical professional | Categorical |
| 40000 | Date of death | Date |
| 41202 | Diagnoses – main ICD10 | Categorical |
| 41270 | Diagnoses - ICD10 | Categorical |
| 32268:32317 | Autism-Spectrum Quotient Items 1:50. | Continuous |
|  |  |  |

**Supplementary Table 3.** Major and Sub-Major Occupational classifications of UK Biobank volunteers.

| **Major Group** | **Sub-Major Group** |
| --- | --- |
| Managers, Directors, and Senior Officials | Corporate Managers and Directors |
| Other Managers and Proprietors |
| Professional Occupations | Science, Research, Engineering, and Technology Professionals* |
| Health Professionals |
| Teaching and Other Educational Professionals |
| Business, Media, and Public Service Professionals |
| Associate Professional Occupations | Science, Research, Engineering, and Technology Associate Professionals* |
| Health and Social Care Associate Professionals |
| Protective Service Occupations |
| Culture, Media, and Sport Occupations |
| Administrative and Secretarial Occupations | Administrative Occupations |
| Secretarial and Related Occupations |
| Skilled Trades Occupations | Skilled Agricultural and Related Trades |
| Skilled Metal, Electrical, and Electronic Trades |
| Skilled Construction and Building Trades |
| Textiles, Printing, and Other Skilled Trades |
| Caring, Leisure, and Other Service Occupations | Caring Personal Service Occupations |
| Leisure, Travel, and Related Personal Service Occupations |
| Community and Civil Enforcement Occupations |
| Sales and Customer Service Occupations | Sales Occupations |
| Customer Service Occupations |
| Process, Plant, and Machine Operatives | Process, Plant, Machine and Construction Operatives |
| Transport and Mobile Machine Drivers and Operatives |
| Elementary Occupations | Elementary Trades and Related Occupations |
| Elementary Administration and Service Occupations |
|  |  |

** denotes STEM occupations*
